# Supplementary material for: Single-cell imaging of α and β cell metabolic response to glucose in living human Langerhans islets
Source: PubMed Central journal article supplement (PMC9653440; doi:10.1038/s42003-022-04215-w), 2022-11-12
Supplement: 42003_2022_4215_MOESM2_ESM.pdf [file 42003_2022_4215_MOESM2_ESM.pdf]

# 1 Supplementary figures and tables

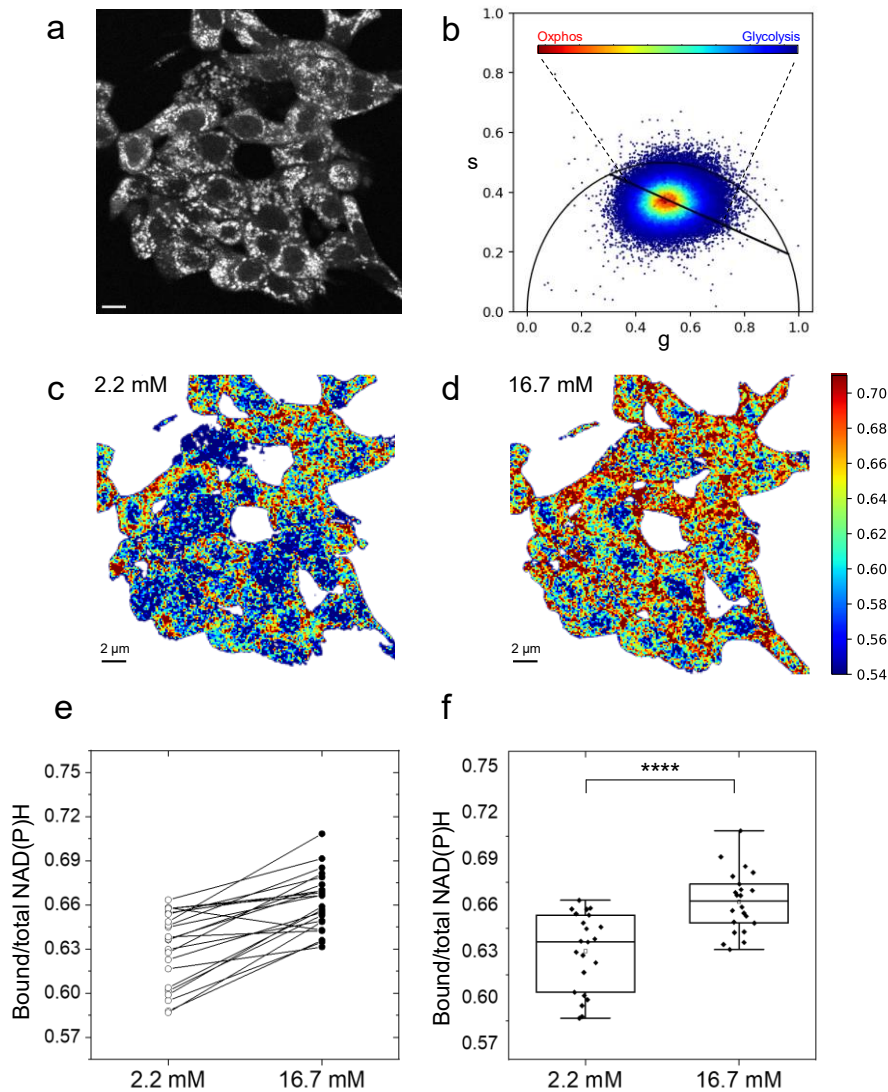

2  
3

4 **Fig. S1: Metabolic imaging of INS-1E cells.** Before the FLIM acquisition, INS-1E cells were  
5 placed in starvation using SAB buffer supplemented with 2.2 mM glucose for 45 minutes, then  
6 imaged in the same conditions (a). As shown in (b), each pixel in the fluorescence-intensity image  
7 has a corresponding point in the phasor plot. Glucose stimulation was performed by adding glucose  
8 within the SAB buffer to reach a final concentration of 16.7 mM. After 3 minutes, the same cell-  
9 clusters acquired at low glucose were acquired upon glucose stimulation. (c-d) Color-coded FLIM  
10 maps at 2.2 mM and 16.7 mM were prepared to better appreciate the metabolic shift induced by  
11 glucose stimulation: blueish pixels present a shift towards the NAD(P)H free form compared to the  
12 median (green), while reddish are towards bound NAD(P)H. By comparing the two metabolic maps  
13 a clear whole-frame shift towards bound NAD(P)H can be observed. (e) The difference between 2.2

14 mM to 16.7 mM conditions determines the single-cell metabolic shift. (f) The average metabolic  
15 response (55 cells from n=3 independent samples) consists in a marked shift towards bound form  
16 (i.e. oxidative phosphorylation), in keeping with literature. Data reported and mean  $\pm$ SD (Standard  
17 Deviation). Statistical difference obtained using Paired Samples Wilcoxon Test, with significance  $\alpha$   
18 = 0.05 (\*: P < 0.05; \*\*: P < 0.01; \*\*\*: P < 0.001; \*\*\*\*: P < 0.0001). Scale bar: 2  $\mu$ m.

19

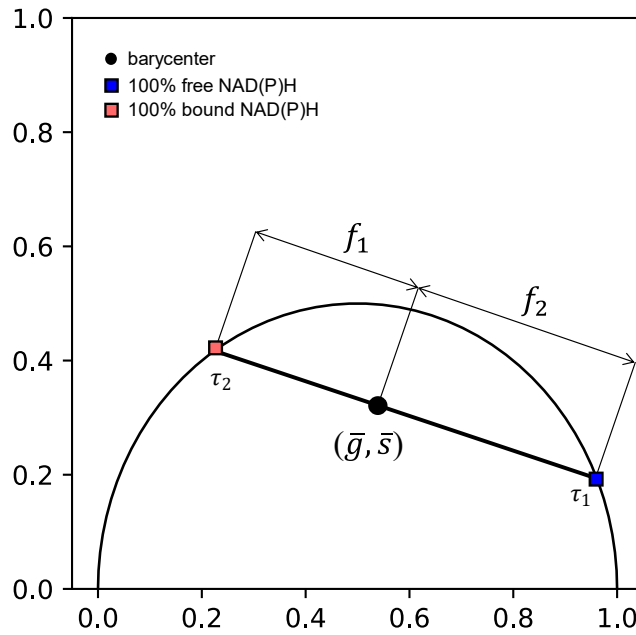

21

22 **Fig. S2: Determination of Bound/total NAD(P)H ratio.** Barycenter is calculated using the  
 23 mathematical definition in **Eq. 2** and lies on the metabolic axis, i.e. the segment connecting the  
 24 reference points at  $\tau_1=0.4$  ns (free NAD(P)H) and  $\tau_2=3.4$  ns (bound NAD(P)H). The barycenter  
 25 coordinates can be converted into the Bound/total NAD(P)H ratio by **Eq. 3** in Materials and Methods.  
 26 By definition, such ratio quantifies the fractional intensity of NAD(P)H in the ‘bound’ form with  
 27 respect to the total NAD(P)H (bound + free) present in cell. Additionally, by definition,  $f_2=0$  means  
 28 that the phasor barycenter coincides with point  $\tau_1$ , then NAD(P)H is exclusively in the free form,  
 29 whereas  $f_1=0$  means that the phasor barycenter coincides with  $\tau_2$  and then that NAD(P)H is  
 30 exclusively in the bound form. The fractional intensities measured by FLIM can be converted into  
 31 the actual (molar) fractions of ‘bound’ and ‘free’ NAD(P)H only by means of the quantum yields of  
 32 the two species (see main text for further details).

33

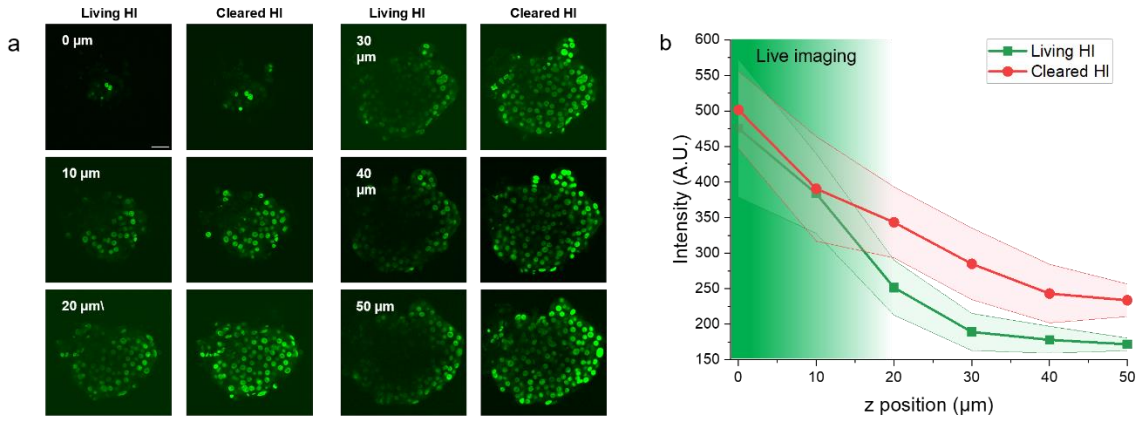

34

35 **Fig. S3. Assessment of the optimal focal plane.** (a) A living human islet (HI) has been imaged at  
 36 different focal planes, starting from the ‘basal’ one and then progressively deeper within the islet  
 37 (left columns). Then, the same islet was fixed and cleared to decrease the signal loss and finally  
 38 imaged following the same procedure (right columns). (b) For each acquired image, the mean  
 39 intensity value in the center of the image was derived and displayed in the plot. It can be observed  
 40 that imaging in a living islet is acceptable only within the first 10-15 μm from the bottom (<20%  
 41 loss of signal, approximately). By contrast, the use of clearing procedures allows acceptable  
 42 imaging performances deeper within the tissue imaging. Scale bar: 30 μm.

43

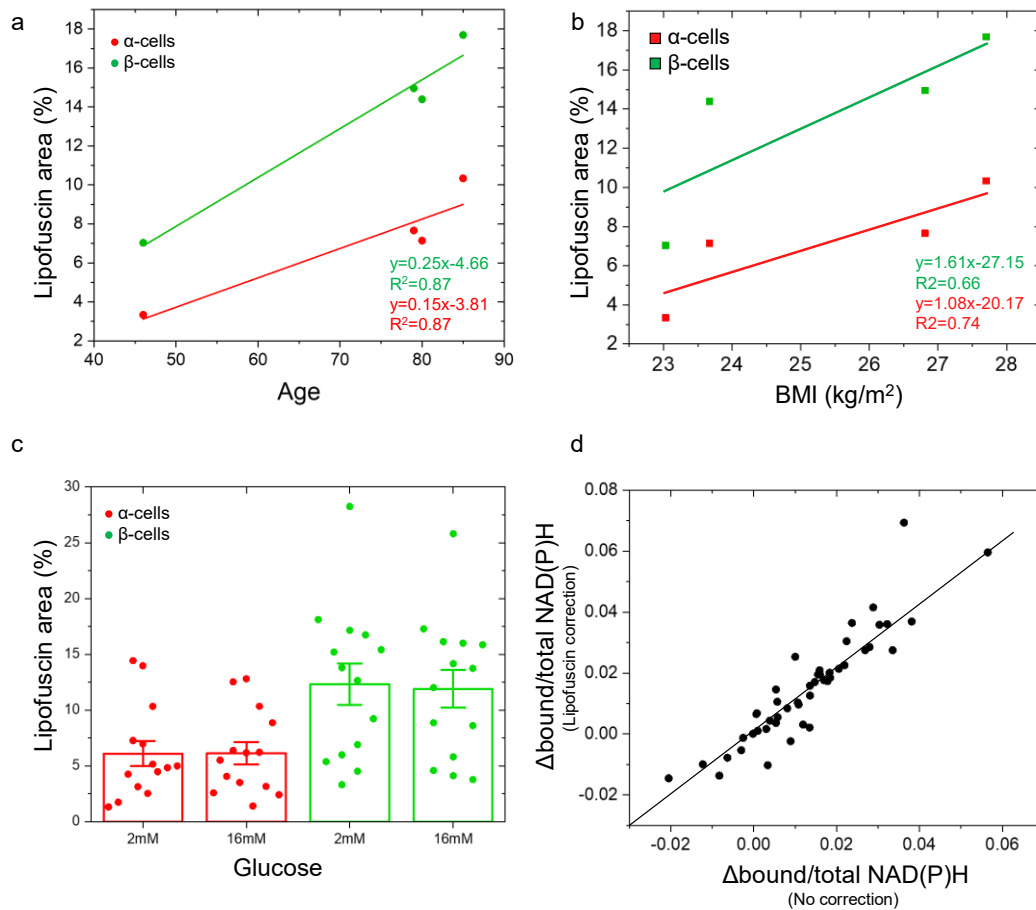

44

45 **Fig. S4: Lipofuscin content among different donors and effects of glucose stimulation. (a)**

46 Lipofuscin content linearly correlates with donor age for both  $\alpha$ - and  $\beta$ -cell types. The graph legend

47 displays the fitting equation with the associated  $R^2$  coefficient. **(b)** Lipofuscin content correlates with

48 Body Mass Index for both  $\alpha$ - and  $\beta$ -cells. The graph legend displays the fitting equation with the

49 associated  $R^2$  coefficient. **(c)** Glucose stimulation has no effect on lipofuscin content in both cell

50 types. Data presented as donor Mean  $\pm$  Standard Error (SE) values from n=14 islets. **(d)** To assess

51 the effect of lipofuscin correction on metabolic shifts, the same cells were analyzed with and without

52 lipofuscin correction. Most of the experimental points lie close to bisection line, showing that

53 lipofuscin correction has a negligible effect on the derived metabolic shift. Each point in the graph

54 represents a single cell in a representative islet.

55

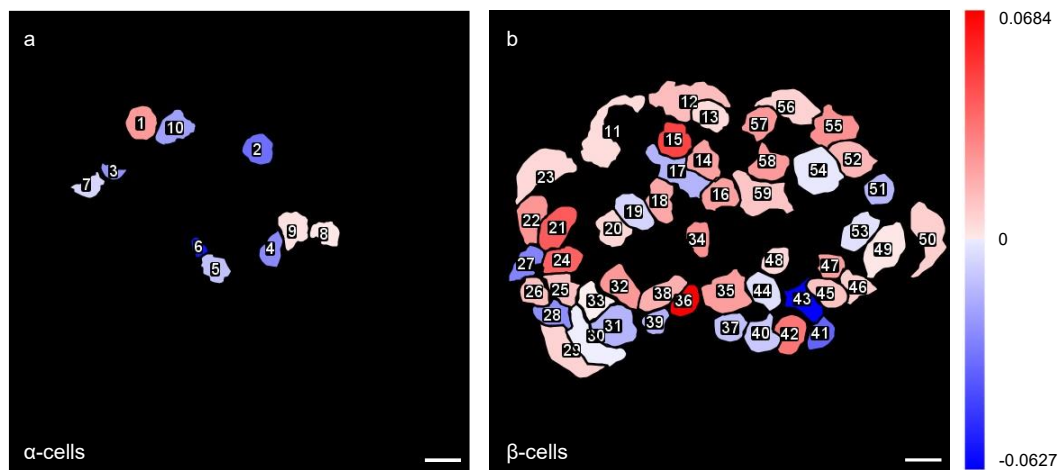

56

57

58 **Fig. S5. Metabolic map of the representative islet in Fig. 4.** Color-map encoding the magnitude  
 59 of single-cell metabolic responses for  $\alpha$  cells (a) and  $\beta$  cells (b). Metabolic shifts towards free  
 60 NAD(P)H are reddish, those towards bound form are blueish, with magnitude encoded by color  
 61 intensity.

62

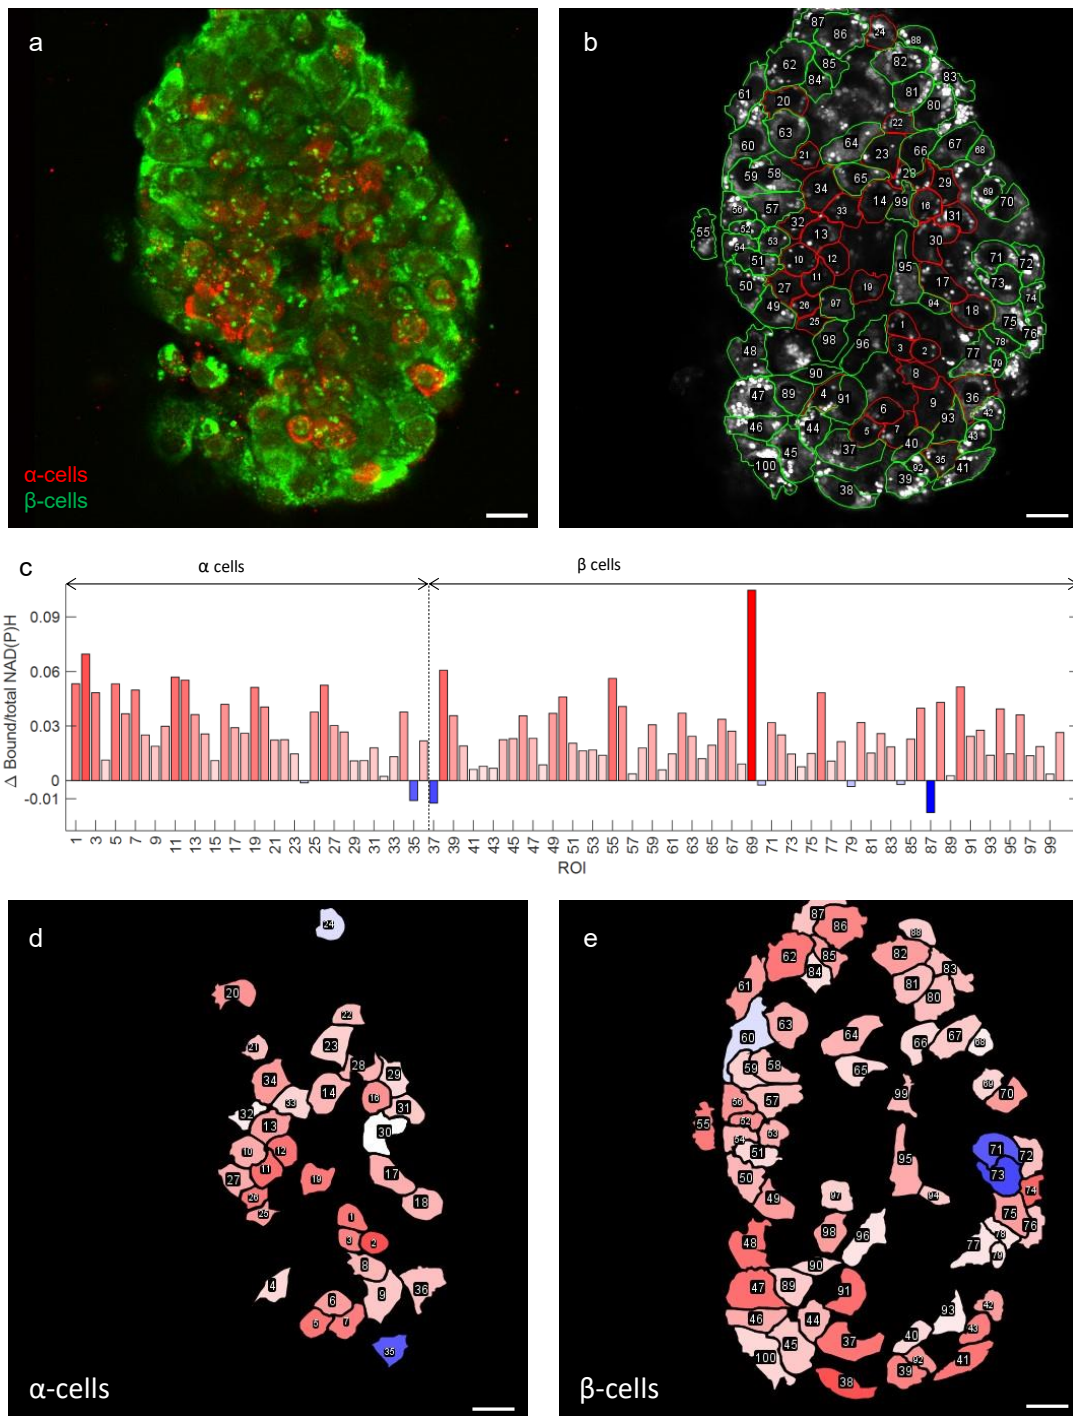

64

65 **Fig. S6. Single-cell metabolic response of representative islet.** (a) Post-fixation  
 66 immunofluorescence allows discriminating  $\alpha$  and  $\beta$  cells in the islet; (b) single-cell segmentation is  
 67 performed. A unique identifier is assigned to each ROI to distinguish the same cell in both 2.2 mM  
 68 and 16.7 mM conditions; (c) phasor-FLIM barycenter displacement along the metabolic axis upon  
 69 glucose stimulation determines the metabolic shift ( $\Delta$ bound/total NAD(P)H) displayed here;  
 70 Color-map encoding the magnitude of single-cell metabolic responses for  $\alpha$  cells (d) and  $\beta$  cells (e).

71 Metabolic shifts towards free NAD(P)H are reddish, those towards bound form are blueish, with  
72 magnitude encoded by color intensity.



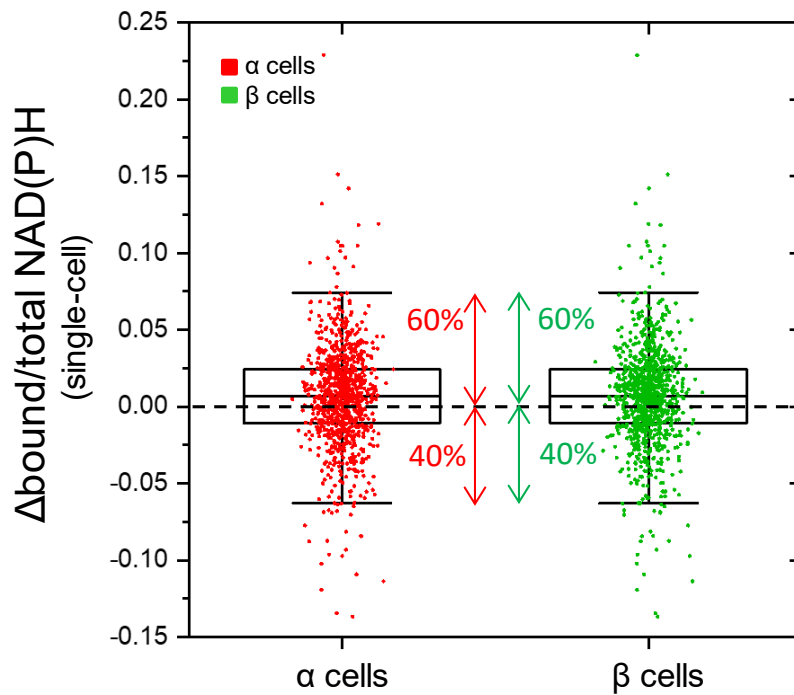

74

75 **Fig. S7. Single-cell metabolic shift response.** Heterogeneity of response can be found in both  $\alpha$ -  
 76 ( $n_{\alpha}$ =312 cells collected) and  $\beta$ -cells ( $n_{\beta}$ =654 cells collected): in both cell types, approximately 60%  
 77 of cells display a metabolic shift towards higher bound/total NAD(P)H values (and the remaining  
 78 40% towards lower values).

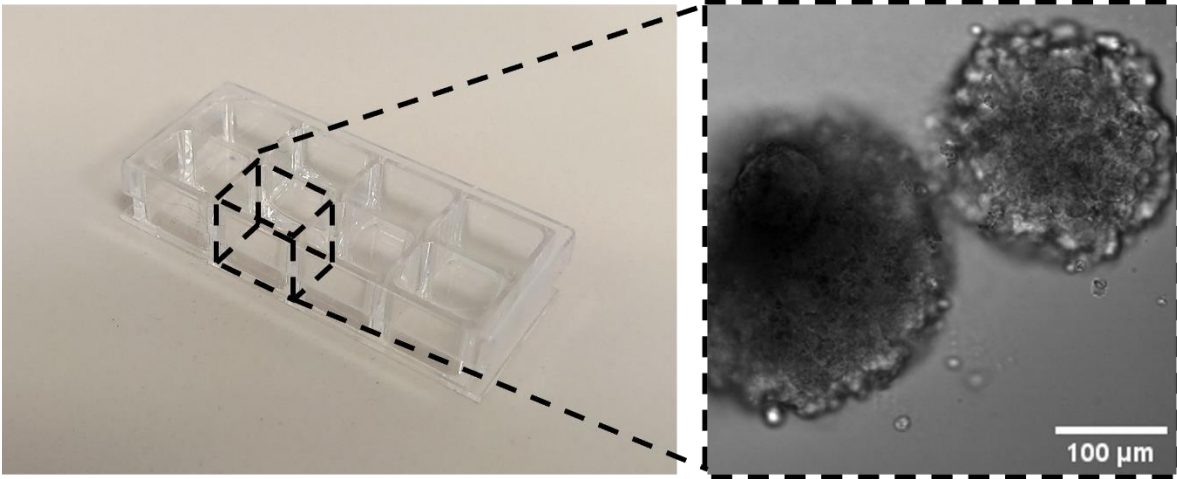

79

80 **Fig. S8 Human islets culturing chamber.** 8-well coverglass (Sarstedt; 94.6170.802, left) were  
81 used to perform live imaging of human Langerhans islets (transmitted light microscopy, right).

82

| Age (y)   | Sex (M/F) | Diabetes (ND/T2D) | BMI (Kg/m <sup>2</sup> ) | Cause of death                | Stimulation index normalised for insulin content (a.u.) |
|-----------|-----------|-------------------|--------------------------|-------------------------------|---------------------------------------------------------|
| <b>85</b> | <b>M</b>  | <b>ND</b>         | <b>27.7</b>              | <b>cardiovascular disease</b> | <b>1.37</b>                                             |
| 88        | M         | ND                | 24.5                     | cardiovascular disease        | 1.47                                                    |
| 52        | F         | ND                | 25.71                    | cardiovascular disease        | 1.87                                                    |
| 81        | F         | ND                | 24.98                    | cardiovascular disease        | 2.04                                                    |
| <b>80</b> | <b>M</b>  | <b>ND</b>         | <b>23.03</b>             | <b>cardiovascular disease</b> | <b>2.32</b>                                             |
| 82        | F         | ND                | 22.04                    | cardiovascular disease        | 2.82                                                    |
| 72        | F         | ND                | 22.86                    | cardiovascular disease        | 3.01                                                    |
| 81        | M         | ND                | 27.68                    | cardiovascular disease        | 3.16                                                    |
| <b>46</b> | <b>M</b>  | <b>ND</b>         | <b>23.67</b>             | <b>trauma</b>                 | <b>3.9</b>                                              |
| 49        | F         | ND                | 31.22                    | cardiovascular disease        | 3.91                                                    |
| 85        | F         | ND                | 23.44                    | cardiovascular disease        | 4.29                                                    |
| 89        | F         | ND                | 19.53                    | cardiovascular disease        | 4.37                                                    |
| 86        | F         | ND                | 27.05                    | cardiovascular disease        | 4.45                                                    |
| 77        | M         | ND                | 26.2                     | cardiovascular disease        | 4.58                                                    |
| 62        | M         | ND                | 37.04                    | cardiovascular disease        | 4.59                                                    |
| 61        | M         | ND                | 24.8                     | trauma                        | 4.78                                                    |
| <b>79</b> | <b>M</b>  | <b>ND</b>         | <b>26.81</b>             | <b>cardiovascular disease</b> | <b>5.35</b>                                             |

83

84 **Table S1: Donor-related personal data and insulin secretion assay results.** Metabolic-imaged  
85 donors are reported in bold. Glossary: y: years, M/F: Male/Female, ND: Non diabetic, T2D: type 2  
86 diabetes, BMI=Body Mass Index.

|                | Mean $\alpha$ -cells<br>Lipofuscin<br>area (%) | Mean $\beta$ -cells<br>Lipofuscin<br>area (%) | $\beta/\alpha$ ratio | Stimulation index<br>normalised for insulin<br>content (a.u.) |
|----------------|------------------------------------------------|-----------------------------------------------|----------------------|---------------------------------------------------------------|
| <b>Donor 1</b> | 10                                             | 18                                            | 1.71                 | 1.37                                                          |
| <b>Donor 2</b> | 7                                              | 14                                            | 2.11                 | 2.32                                                          |
| <b>Donor 3</b> | 3                                              | 7                                             | 2.02                 | 3.9                                                           |
| <b>Donor 4</b> | 8                                              | 15                                            | 1.95                 | 5.35                                                          |

94 **Table S2: Donor lipofuscin quantity and  $\beta/\alpha$  ratio in terms of lipofuscin quantity.** increasing  
95 Mean  $\alpha$ - and  $\beta$ -cell lipofuscin area values for each donor are obtained by averaging all the single-  
96 cell ratios between the lipofuscin-enriched area total cell area.  $\beta/\alpha$  ratio is obtained by dividing the  
97 mean  $\beta$ -cell lipofuscin area by the mean  $\alpha$ -cell lipofuscin area.

|                 | $\beta$ (%) | $\alpha$ (%) |
|-----------------|-------------|--------------|
| <b>Islet 1</b>  | 92          | 8            |
| <b>Islet 2</b>  | 78          | 23           |
| <b>Islet 3</b>  | 58          | 42           |
| <b>Islet 4</b>  | 63          | 37           |
| <b>Islet 5</b>  | 64          | 36           |
| <b>Islet 6</b>  | 78          | 22           |
| <b>Islet 7</b>  | 44          | 56           |
| <b>Islet 8</b>  | 64          | 36           |
| <b>Islet 9</b>  | 53          | 47           |
| <b>Islet 10</b> | 57          | 43           |
| <b>Islet 11</b> | 53          | 47           |
| <b>Islet 12</b> | 63          | 37           |
| <b>Islet 13</b> | 92          | 8            |
| <b>Islet 14</b> | 83          | 17           |
| <b>Islet 15</b> | 77          | 23           |

98

99 **Table S3:  $\alpha/\beta$  cell proportions in all measured islets.**

100

101

102

| <b>Reagents</b>                    | <b>Company</b>           | <b>Code</b> |
|------------------------------------|--------------------------|-------------|
| 2,2-Thiodiethanol                  | Merck                    | 166782      |
| Agarose                            | Merck                    | A9414       |
| Calcium chloride                   | Merck                    | 1.02391     |
| D-Glucose                          | Gibco                    | 15023021    |
| Hepes                              | Thermo Fisher Scientific | 11344041    |
| Hoechst 33342                      | Thermo Fisher Scientific | H3570       |
| Phosphate Buffered Saline          | Thermo Fisher Scientific | 18912       |
| Potassium chloride                 | Avantor                  | 0509        |
| Potassium phosphate monobasic      | Merck                    | P5655       |
| Sodium chloride                    | Merck                    | 71376       |
| Triton X-100                       | Merck                    | T9284       |
| <b>Primary Antibodies</b>          | <b>Company</b>           | <b>Code</b> |
| Anti-Glucagon                      | Merck                    | SAB4501137  |
| Anti-Insulin                       | Bio-Rad                  | MCA1911G    |
| <b>Secondary Antibodies</b>        | <b>Company</b>           | <b>Code</b> |
| Donkey Anti-Mouse Alexa Fluor 488  | Thermo Fisher Scientific | A21202      |
| Donkey Anti-Rabbit Alexa Fluor 594 | Thermo Fisher Scientific | A21207      |

103

104 **Table S4: Reagents utilized to perform the experiments.**

105
